# Supplementary material for: Exploring the Therapeutic Potentials and Molecular Mechanisms of Coscinium fenestratum Alkaloids in Ulcerative Colitis: An Integrative Network Pharmacology and Molecular Docking Approach
Source: PubMed Central journal article supplement — Prev Nutr Food Sci. 2024 Dec 31;29(4):441–53. doi: 10.3746/pnf.2024.29.4.441 (PMC11699582; doi:10.3746/pnf.2024.29.4.441), 2024-12-31
Supplement: pnfs-29-4-441-supple.pdf [file pnfs-29-4-441-supple.pdf]

**Supplementary Table 1.** Common genes between ulcerative colitis (UC) and *Coscinium fenestratum* alkaloids according to differentially expressed genes from GSE59071 between UC tissues and normal tissues

| Gene name       | Log <sub>2</sub> FC | P-value  | Adj P-value | Gene class |
|-----------------|---------------------|----------|-------------|------------|
| <i>MMP3</i>     | 3.79                | 3.75E-09 | 1.85E-07    | Up         |
| <i>IDO1</i>     | 3.42                | 4.78E-11 | 5.16E-09    | Up         |
| <i>MMP1</i>     | 3.26                | 1.39E-07 | 3.58E-06    | Up         |
| <i>PTGS2</i>    | 2.74                | 6.21E-09 | 2.81E-07    | Up         |
| <i>NOS2</i>     | 2.74                | 2.33E-08 | 8.39E-07    | Up         |
| <i>MMP12</i>    | 2.54                | 5.73E-07 | 1.12E-05    | Up         |
| <i>TGM2</i>     | 2.12                | 3.09E-11 | 3.52E-09    | Up         |
| <i>SELE</i>     | 2.10                | 1.51E-06 | 2.47E-05    | Up         |
| <i>PIM2</i>     | 1.98                | 6.31E-07 | 1.21E-05    | Up         |
| <i>MMP9</i>     | 1.81                | 5.23E-06 | 6.95E-05    | Up         |
| <i>ICAM1</i>    | 1.76                | 3.21E-07 | 6.96E-06    | Up         |
| <i>PFKFB3</i>   | 1.71                | 1.60E-08 | 6.10E-07    | Up         |
| <i>SERPINE1</i> | 1.68                | 4.29E-05 | 0.000393    | Up         |
| <i>EDNRA</i>    | 1.65                | 6.55E-07 | 1.25E-05    | Up         |
| <i>CTSK</i>     | 1.59                | 3.19E-06 | 4.62E-05    | Up         |
| <i>MMP2</i>     | 1.56                | 1.16E-05 | 0.000135    | Up         |
| <i>FPR2</i>     | 1.55                | 3.13E-05 | 0.000305    | Up         |
| <i>ALPL</i>     | 1.54                | 1.96E-06 | 3.09E-05    | Up         |
| <i>MME</i>      | 1.41                | 6.77E-06 | 8.62E-05    | Up         |
| <i>CXCR2</i>    | 1.40                | 7.05E-05 | 0.000588    | Up         |
| <i>CXCR4</i>    | 1.37                | 3.21E-07 | 6.96E-06    | Up         |
| <i>KDR</i>      | 1.35                | 2.55E-06 | 3.82E-05    | Up         |
| <i>FPR1</i>     | 1.35                | 7.04E-05 | 0.000587    | Up         |
| <i>ENPP2</i>    | 1.31                | 4.96E-07 | 9.97E-06    | Up         |
| <i>FFAR2</i>    | 1.31                | 8.35E-05 | 0.000681    | Up         |
| <i>TFPI</i>     | 1.30                | 9.50E-07 | 1.69E-05    | Up         |
| <i>PLA2G2A</i>  | 1.29                | 1.32E-05 | 0.000149    | Up         |
| <i>FLT1</i>     | 1.28                | 4.22E-07 | 8.72E-06    | Up         |
| <i>BACE2</i>    | 1.25                | 5.20E-13 | 1.18E-10    | Up         |
| <i>FYN</i>      | 1.22                | 5.20E-09 | 2.42E-07    | Up         |
| <i>CDC25B</i>   | 1.21                | 6.21E-10 | 4.17E-08    | Up         |
| <i>LYN</i>      | 1.21                | 3.81E-08 | 1.24E-06    | Up         |
| <i>SCD</i>      | 1.21                | 6.26E-08 | 1.86E-06    | Up         |
| <i>XBP1</i>     | 1.20                | 2.45E-11 | 3.00E-09    | Up         |
| <i>F3</i>       | 1.20                | 8.95E-10 | 5.70E-08    | Up         |
| <i>PDE4B</i>    | 1.19                | 5.86E-09 | 2.66E-07    | Up         |
| <i>LRRK2</i>    | 1.19                | 8.32E-05 | 0.000678    | Up         |
| <i>BCL6</i>     | 1.18                | 1.46E-05 | 0.000163    | Up         |
| <i>EPHA2</i>    | 1.16                | 2.57E-08 | 9.06E-07    | Up         |
| <i>HIF1A</i>    | 1.15                | 1.26E-07 | 3.27E-06    | Up         |
| <i>STAT1</i>    | 1.09                | 1.50E-07 | 3.81E-06    | Up         |
| <i>TEK</i>      | 1.08                | 8.63E-08 | 2.41E-06    | Up         |
| <i>JAK3</i>     | 1.06                | 5.74E-07 | 1.12E-05    | Up         |
| <i>PLK2</i>     | 1.04                | 1.13E-09 | 6.84E-08    | Up         |
| <i>RIPK2</i>    | 1.01                | 7.41E-07 | 1.38E-05    | Up         |
| <i>GRK5</i>     | 1.01                | 1.32E-06 | 2.21E-05    | Up         |
| <i>TBXAS1</i>   | 1.00                | 3.09E-11 | 3.52E-09    | Up         |
| <i>ABCG2</i>    | -3.33               | 7.08E-12 | 1.07E-09    | Down       |
| <i>CA1</i>      | -2.44               | 2.78E-05 | 0.000276    | Down       |
| <i>ABCB1</i>    | -2.27               | 4.23E-10 | 3.02E-08    | Down       |
| <i>PHLPP2</i>   | -2.11               | 1.28E-13 | 3.88E-11    | Down       |
| <i>ANPEP</i>    | -1.99               | 1.78E-07 | 4.37E-06    | Down       |
| <i>HSD17B2</i>  | -1.77               | 2.28E-11 | 2.81E-09    | Down       |
| <i>ENPP1</i>    | -1.67               | 5.64E-13 | 1.26E-10    | Down       |

**Supplementary Table 1.** Continued

| Gene name      | Log <sub>2</sub> FC | P-value  | Adj P-value | Gene class |
|----------------|---------------------|----------|-------------|------------|
| <i>NAAA</i>    | -1.50               | 6.41E-11 | 6.56E-09    | Down       |
| <i>CA7</i>     | -1.40               | 0.000909 | 0.00492     | Down       |
| <i>CA2</i>     | -1.39               | 2.47E-06 | 3.72E-05    | Down       |
| <i>HPGD</i>    | -1.36               | 1.02E-06 | 1.79E-05    | Down       |
| <i>EPHX2</i>   | -1.35               | 2.64E-06 | 3.93E-05    | Down       |
| <i>PPARG</i>   | -1.33               | 2.81E-09 | 1.46E-07    | Down       |
| <i>MAOA</i>    | -1.33               | 1.83E-05 | 0.000197    | Down       |
| <i>CA4</i>     | -1.33               | 0.000073 | 0.000605    | Down       |
| <i>TDP2</i>    | -1.30               | 1.32E-11 | 1.81E-09    | Down       |
| <i>NR1H4</i>   | -1.26               | 3.05E-05 | 0.000298    | Down       |
| <i>CPT1A</i>   | -1.17               | 6.67E-14 | 2.17E-11    | Down       |
| <i>HSD11B2</i> | -1.08               | 0.00128  | 0.00654     | Down       |
| <i>THRB</i>    | -1.06               | 5.73E-05 | 0.000497    | Down       |
| <i>SLC1A1</i>  | -1.05               | 9.62E-06 | 0.000115    | Down       |

**Supplementary Table 2.** Top genes with a degree over the average from the protein-protein interaction network between the 59 genes after hiding disconnected genes

| Gene name       | Betweenness centrality | Closeness centrality | Degree |
|-----------------|------------------------|----------------------|--------|
| <i>PTGS2</i>    | 0.2285                 | 0.6042               | 24     |
| <i>MMP9</i>     | 0.1388                 | 0.5686               | 22     |
| <i>KDR</i>      | 0.0591                 | 0.5524               | 22     |
| <i>HIF1A</i>    | 0.1093                 | 0.5686               | 22     |
| <i>ICAM1</i>    | 0.0649                 | 0.5631               | 22     |
| <i>CXCR4</i>    | 0.1006                 | 0.5472               | 21     |
| <i>MMP2</i>     | 0.0611                 | 0.5370               | 19     |
| <i>SELE</i>     | 0.0134                 | 0.5273               | 17     |
| <i>PPARG</i>    | 0.1715                 | 0.5472               | 17     |
| <i>STAT1</i>    | 0.0560                 | 0.5225               | 15     |
| <i>SERPINE1</i> | 0.0314                 | 0.5000               | 15     |
| <i>FLT1</i>     | 0.0070                 | 0.4874               | 14     |
| <i>MMP3</i>     | 0.0062                 | 0.4874               | 12     |
| <i>MMP1</i>     | 0.0041                 | 0.4874               | 12     |
| <i>CXCR2</i>    | 0.0297                 | 0.4640               | 11     |
| <i>TEK</i>      | 0.0019                 | 0.4394               | 9      |
| <i>NOS2</i>     | 0.0363                 | 0.4833               | 9      |
| <i>F3</i>       | 0.0114                 | 0.4496               | 9      |

**Supplementary Table 3.** The topology of the alkaloids in the *Cosciniium fenestratum* alkaloids-compounds-hub genes network

| Compound                           | Betweenness centrality | Closeness centrality | Degree |
|------------------------------------|------------------------|----------------------|--------|
| Dehydrodiscretamine                | 0.1451                 | 0.5263               | 6      |
| Berberrubine                       | 0.0794                 | 0.5263               | 6      |
| Thalifendine                       | 0.0525                 | 0.5000               | 5      |
| ( <i>S</i> )-Tetrahydrocolumbamine | 0.0451                 | 0.5000               | 5      |
| Rotundine                          | 0.0491                 | 0.4762               | 4      |
| Oxyberberine                       | 0.0582                 | 0.4762               | 4      |
| Jatrorrhizine                      | 0.0285                 | 0.4545               | 4      |
| Berberine                          | 0.1993                 | 0.4545               | 4      |
| Palmatine                          | 0.0222                 | 0.3704               | 3      |
| Canadine                           | 0.0034                 | 0.4000               | 2      |
| Berberrubine chloride              | 0.0066                 | 0.4167               | 2      |

**Supplementary Table 4.** Molecular docking information of the key active compounds in *Coscinium fenestratum* alkaloid and ulcerative colitis-related hub genes

| Target | PDB ID | Alkaloid                  | Binding energy (kcal/mol) | Bond interaction                                                                                                                                                                                   |                                                                                                     |
|--------|--------|---------------------------|---------------------------|----------------------------------------------------------------------------------------------------------------------------------------------------------------------------------------------------|-----------------------------------------------------------------------------------------------------|
|        |        |                           |                           | Conventional hydrogen bond, carbon hydrogen bond, Pi-donor Hydrogen bond, Pi-sigma, amide-Pi stacked, alkyl, Pi-alkyl, Pi-cation, Pi-anion, unfavorable acceptor-acceptor, unfavorable donor-donor | Van der Waals                                                                                       |
| PTGS2  | 5IKQ   | Thalifendine              | -9.7                      | ARG44, VAL46, CYS47, GLY135, LEU152, PRO153, PRO156, GLN461, ARG469                                                                                                                                | CYS36, HIS39, CYS41, GLN42, ASN43, GLY45, TYR130, TYR136, GLU465, LYS468                            |
|        |        | Dehydrodiscretamine       | -9.3                      | GLY45, CYS47, LEU152, PRO153, GLU465, ARG469                                                                                                                                                       | CYS36, HIS39, CYS41, ARG44, VAL46, TYR130, GLY135, PRO156, GLN461, LYS468                           |
|        |        | Berberrubine              | -9.1                      | CYS36, ARG44, CYS47, TYR130, GLY135, LEU152, PRO153, PRO156, ARG469                                                                                                                                | HIS39, CYS41, GLN42, ASN43, GLY45, VAL46, TYR136, GLN461, LYS468                                    |
|        |        | (S)-Tetrahydrocolumbamine | -8.7                      | ALA199, HIS207, THR212, HIS214, TYR385, HIS386, LEU390, LEU391, GLN454                                                                                                                             | ALA202, GLN203, PHE210, ASN382, TRP387, HIS388, VAL447                                              |
| CXCR4  | 3ODU   | Thalifendine              | -9.3                      | TRP94, ALA98, HIS113, TYR116                                                                                                                                                                       | LEU41, ASP97, VAL112, SER285                                                                        |
|        |        | Dehydrodiscretamine       | -8.7                      | TRP94, ASP97, ALA98, HIS113, GLU288                                                                                                                                                                | GLU32, VAL112, TYR116, ARG183, HIS281, SER285                                                       |
|        |        | Berberrubine              | -9.1                      | TRP94, ASP97, TRP102, VAL112, HIS113, ARG188, HIS203, GLU288                                                                                                                                       | PHE93, TYR116, GLN200, TYR255                                                                       |
|        |        | (S)-Tetrahydrocolumbamine | -8.3                      | TRP94, ASP97, TRP102, VAL112, HIS113, TYR255, ILE259, ILE284, GLU288                                                                                                                               | PHE93, TYR116, CYS186, ARG188                                                                       |
| MMP3   | 1G49   | Thalifendine              | -9.0                      | LEU697, VAL698, HIS701, GLU716, ALA717, LEU718, TYR723, LEU726                                                                                                                                     | TYR720, LEU722, HIS724, ARG731, and PHE732                                                          |
|        |        | Dehydrodiscretamine       | -8.2                      | LEU697, HIS701, THR715, GLU716, LEU718, LEU726, ARG731                                                                                                                                             | VAL698, ALA717, TYR720, LEU722, TYR723, HIS724, PHE732                                              |
|        |        | Berberrubine              | -9.3                      | VAL663, LEU697, HIS701, ALA717, HIS724                                                                                                                                                             | LEU664, ALA665, VAL698, GLU702, THR715, LEU718, TYR720, PRO721, LEU722, TYR723                      |
|        |        | (S)-Tetrahydrocolumbamine | -9.0                      | LEU697, HIS701, LEU718, LEU726, ARG731                                                                                                                                                             | VAL698, GLU716, ALA717, TYR720, LEU722, TYR723, HIS724, PHE732                                      |
| FLT1   | 3HNG   | Thalifendine              | -8.7                      | LEU882, VAL891, VAL892, LEU1013, HIS1020, ILE1038                                                                                                                                                  | ASP807, ALA874, GLU878, ILE881, ILE885, HIS887, CYS1018, CYS1039, ASP1040                           |
|        |        | Dehydrodiscretamine       | -8.5                      | ALA874, GLU878, LEU882, ILE1038, ASP1040                                                                                                                                                           | ASP807, ILE881, ILE885, VAL891, VAL892, LEU1013, CYS1018, HIS1020, CYS1039, GLY1042, LEU1043        |
|        |        | Berberrubine              | -9.1                      | LEU882, VAL892, ILE1019, ARG1021, CYS1039                                                                                                                                                          | ASP807, LYS861, GLU878, ILE881, ILE885, VAL891, VAL909, LEU1013, CYS1018, HIS1020, ILE1038, ASP1040 |
|        |        | (S)-Tetrahydrocolumbamine | -8.4                      | ASP807, ALA874, ILE881, LEU882, VAL891, VAL892, ASP1040                                                                                                                                            | THR877, GLU878, ILE885, LEU1013, ILE1019, HIS1020, ARG1021, ILE1038, CYS1039                        |
| KDR    | 6GQP   | Thalifendine              | -8.8                      | LEU840, VAL848, ALA866, VAL916, CYS919, LYS920, LEU1035, PHE1047                                                                                                                                   | GLY841, LYS868, VAL899, GLU917, PHE918, GLY922, CYS1045                                             |
|        |        | Dehydrodiscretamine       | -8.8                      | LEU840, VAL848, ALA866, PHE918, CYS919, LEU1035                                                                                                                                                    | GLY841, ARG842, GLY922, ASN923, THR926, PHE1047                                                     |
|        |        | Berberrubine              | -8.7                      | LEU840, VAL848, ALA866, LYS868, VAL916, CYS919, LEU1035, PHE1047                                                                                                                                   | VAL899, GLU917, PHE918, LYS920, PHE921, GLY922, CYS1045, ASP1046                                    |
|        |        | (S)-Tetrahydrocolumbamine | -8.3                      | LEU840, VAL848, ALA866, VAL916, CYS919, LEU1035                                                                                                                                                    | VAL899, GLU917, PHE918, LYS920, GLY922, PHE1047                                                     |

Supplementary Table 4. Continued

| Target | PDB ID | Alkaloid                  | Binding energy (kcal/mol) | Bond interaction                                                                                                                                                                                   |                                                                                |
|--------|--------|---------------------------|---------------------------|----------------------------------------------------------------------------------------------------------------------------------------------------------------------------------------------------|--------------------------------------------------------------------------------|
|        |        |                           |                           | Conventional hydrogen bond, carbon hydrogen bond, Pi-donor Hydrogen bond, Pi-sigma, amide-Pi stacked, alkyl, Pi-alkyl, Pi-cation, Pi-anion, unfavorable acceptor-acceptor, unfavorable donor-donor | Van der Waals                                                                  |
| MMP2   | 8H78   | Thalifendine              | -7.5                      | LEU82, LEU83, ALA84, VAL118, HIS121, TYR143                                                                                                                                                        | HIS131, ALA140, PRO141, ILE412, THR144                                         |
|        |        | Dehydrodiscretamine       | -7.6                      | LEU83, ALA84, VAL118, HIS121, HIS125, HIS131                                                                                                                                                       | PHE5, LEU82, HIS85, ALA86, ALA122, PRO141, ILE142, TYR143                      |
|        |        | Berberrubine              | -7.9                      | HIS121, LEU138, ALA140, TYR143                                                                                                                                                                     | LEU117, PRO135, GLY136, ALA137, ILE142, THR144, THR146, ASN148, PHE149, ARG150 |
|        |        | (S)-Tetrahydrocolumbamine | -7.5                      | LEU117, HIS121, LEU138, ALA140, TYR143, THR146, ASN148                                                                                                                                             | VAL118, PRO135, GLY136, ALA137, ILE142, THR144, PHE149, ARG150                 |
| MMP9   | 1GKC   | Thalifendine              | -7.5                      | LEU187, LEU188, VAL398, HIS401, TYR423                                                                                                                                                             | GLY186, ALA189, LEU397, GLU402, LEU418, PRO421, MET422, ARG424                 |
|        |        | Dehydrodiscretamine       | -7.5                      | LEU188, ALA189, ALA191, GLU402, HIS405, HIS411, PRO421, TYR423                                                                                                                                     | PHE110, GLU111, LEU187, HIS190, HIS401, MET422                                 |
|        |        | Berberrubine              | -7.8                      | GLU111, LEU188, GLU402, HIS405, HIS411                                                                                                                                                             | PHE110, GLY186, LEU187, HIS190, ALA191, HIS401, PRO421, MET422, TYR423         |
|        |        | (S)-Tetrahydrocolumbamine | -6.9                      | LEU187, ALA189, HIS405, HIS411                                                                                                                                                                     | GLY186, LEU188, HIS190, TYR393, VAL398, HIS401, GLU402, PRO421, MET422, TYR423 |
| SELE   | 1G1T   | Thalifendine              | -6.5                      | HIS25, ARG54, VAL63, LYS86, ASP89                                                                                                                                                                  | TYR12, SER16, LYS55, VAL56, GLN66, ASP87                                       |
|        |        | Dehydrodiscretamine       | -6.1                      | TYR12, ASP13, SER16, GLN20, HIS25, VAL63                                                                                                                                                           | ARG54, VAL56, VAL61, GLN66                                                     |
|        |        | Berberrubine              | -7.0                      | LYS55, ARG84, GLN85, LYS86, ASP89                                                                                                                                                                  | ARG54, ASN58, ASP87, GLU88                                                     |
|        |        | (S)-Tetrahydrocolumbamine | -6.3                      | TYR12, ARG54, VAL56, VAL61, VAL63, GLN66                                                                                                                                                           | SER16, HIS25                                                                   |
| ICAM1  | 1IC1   | Thalifendine              | -6.7                      | ASP60, TRP84, ALA114, ARG116, GLY137                                                                                                                                                               | ARG13, GLN58, GLU59, VAL82, GLY112, GLY113, VAL136, GLU138                     |
|        |        | Dehydrodiscretamine       | -6.6                      | GLN58, ASP60, TRP84, ALA114, ARG116, ALA117                                                                                                                                                        | ARG13, GLU59, VAL82, PRO115                                                    |
|        |        | Berberrubine              | -6.7                      | ASP60, TRP84, ALA114, ARG116, ALA117                                                                                                                                                               | ARG13, GLN58, GLU59, VAL82, PRO115, VAL136                                     |
|        |        | (S)-Tetrahydrocolumbamine | -6.2                      | ASP60, TRP84, ALA114, ARG116                                                                                                                                                                       | ARG13, GLU59, GLY112, GLY113, PRO115, ALA117, GLU138                           |
| HIF1A  | 1H2M   | Thalifendine              | -4.8                      | GLY815, GLU816, LEU818, LEU819                                                                                                                                                                     | LEU822                                                                         |
|        |        | Dehydrodiscretamine       | -4.7                      | SER797, TYR798, GLU801                                                                                                                                                                             | LEU795, THR796, ASP799, CYS800, VAL802                                         |
|        |        | Berberrubine              | -4.8                      | GLY815, GLU816, LEU818, LEU819, LEU822                                                                                                                                                             | NA                                                                             |
|        |        | (S)-Tetrahydrocolumbamine | -4.4                      | TYR798, GLU801                                                                                                                                                                                     | ASP799, CYS800                                                                 |

PDB ID, Protein Data Bank Identification code; NA, not available.
